# Supplementary material for: Higher Trimethylamine-N-Oxide Plasma Levels with Increasing Age Are Mediated by Diet and Trimethylamine-Forming Bacteria
Source: PubMed Central journal article supplement (PMC8547441; doi:10.1128/msystems.00945-21), 2021-09-14
Supplement: msystems.00945-21-sf001.pdf [file msystems.00945-21-sf001.pdf]

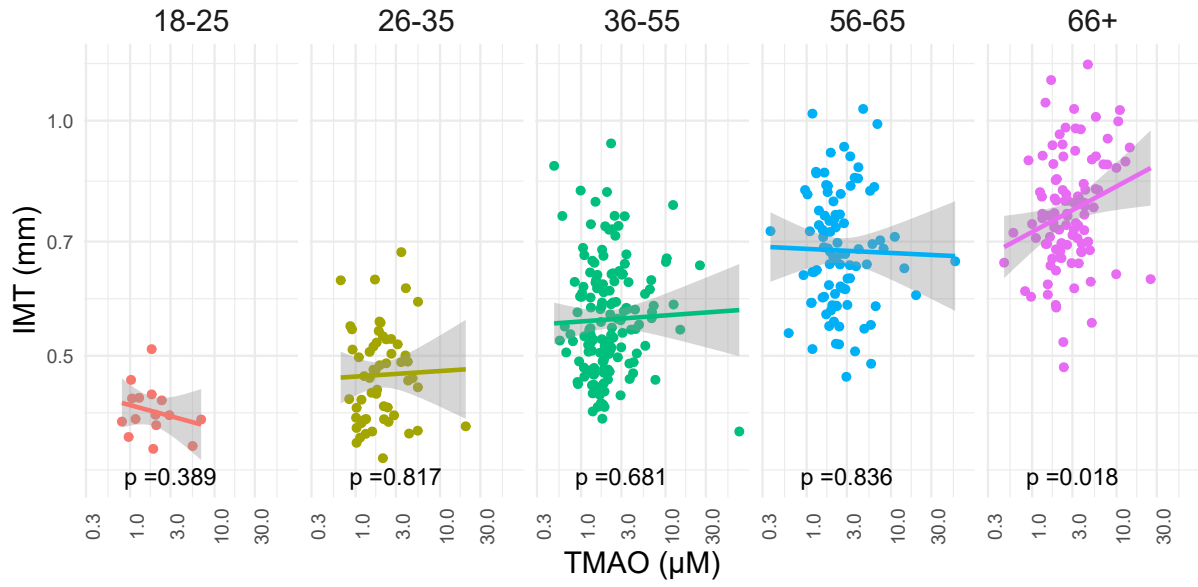

**Figure S1.** Associations between carotid intima–media thickness and TMAO plasma concentration by age groups.
