# Supplementary material for: Higher Trimethylamine-N-Oxide Plasma Levels with Increasing Age Are Mediated by Diet and Trimethylamine-Forming Bacteria
Source: PubMed Central journal article supplement (PMC8547441; doi:10.1128/msystems.00945-21), 2021-09-14
Supplement: msystems.00945-21-st001.pdf [file msystems.00945-21-st001.pdf]

**Table S1.** Differences in plasma-metabolite concentrations and abundances of genes encoding key enzymes (*grdH*, *cntA*, *cutC*) of main TMA-forming pathways in stool samples of subjects by age groups. Significance (p.age) was assessed based on continuous age data.

|                                      | <b>18-25</b><br>(N=16) | <b>26-35</b><br>(N=57) | <b>36-55</b><br>(N=157) | <b>56-65</b><br>(N=94) | <b>66+</b><br>(N=101) | <b>p.age</b>    |
|--------------------------------------|------------------------|------------------------|-------------------------|------------------------|-----------------------|-----------------|
| <b>TMAO (μM)</b>                     |                        |                        |                         |                        |                       | <b>&lt;0.01</b> |
| Mean (SD)                            | 2.23 (1.74)            | 2.53 (2.71)            | 3.18 (6.54)             | 3.69 (6.29)            | 3.60 (3.36)           |                 |
| Median [Min, Max]                    | 1.80 [0.799, 6.94]     | 1.84 [0.666, 20.1]     | 1.85 [0.479, 74.6]      | 2.21 [0.373, 57.4]     | 2.53 [0.466, 25.3]    |                 |
| <b>Choline (μM)</b>                  |                        |                        |                         |                        |                       | <b>0.980</b>    |
| Mean (SD)                            | 4.81 (1.16)            | 8.34 (3.49)            | 7.95 (3.51)             | 8.60 (3.67)            | 8.87 (4.28)           |                 |
| Median [Min, Max]                    | 4.46 [3.16, 7.08]      | 7.81 [3.54, 23.8]      | 7.23 [0.442, 27.7]      | 7.76 [0.518, 18.0]     | 8.03 [0.288, 22.8]    |                 |
| <b>Betaine (μM)</b>                  |                        |                        |                         |                        |                       | <b>&lt;0.01</b> |
| Mean (SD)                            | 13.8 (9.63)            | 21.7 (20.3)            | 18.4 (12.9)             | 19.8 (9.94)            | 22.1 (14.2)           |                 |
| Median [Min, Max]                    | 11.6 [4.13, 38.5]      | 15.6 [4.73, 120]       | 14.8 [3.32, 75.6]       | 18.1 [5.31, 47.4]      | 19.1 [1.48, 84.3]     |                 |
| <b>Carnitine (μM)</b>                |                        |                        |                         |                        |                       | <b>0.022</b>    |
| Mean (SD)                            | 37.0 (25.1)            | 44.6 (22.2)            | 46.7 (21.8)             | 47.6 (20.0)            | 47.5 (19.7)           |                 |
| Median [Min, Max]                    | 32.4 [4.99, 112]       | 36.7 [15.1, 120]       | 44.0 [9.98, 125]        | 43.9 [16.5, 124]       | 46.5 [6.46, 101]      |                 |
| <b><i>cutC</i> (x10<sup>5</sup>)</b> |                        |                        |                         |                        |                       | <b>&lt;0.01</b> |
| Mean (SD)                            | 1.22 (1.37)            | 1.09 (1.17)            | 1.31 (1.35)             | 1.67 (2.02)            | 1.61 (1.28)           |                 |
| Median [Min, Max]                    | 0.88 [0.05, 5.94]      | 0.74 [0.04, 7.22]      | 1.04 [0.04, 11.4]       | 1.21 [0.06, 15.5]      | 1.38 [0.09, 7.41]     |                 |
| <b><i>cntA</i> (x10<sup>5</sup>)</b> |                        |                        |                         |                        |                       | <b>&lt;0.01</b> |
| Mean (SD)                            | 0.626 (1.59)           | 0.157 (0.409)          | 1.24 (4.99)             | 3.23 (15.9)            | 1.59 (3.91)           |                 |
| Median [Min, Max]                    | 0.04 [0.03, 6.44]      | 0.03 [0.03, 2.68]      | 0.03 [0.03, 47.5]       | 0.03 [0.03, 134]       | 0.13 [0.03, 23.4]     |                 |
| <b><i>grdH</i> (x10<sup>5</sup>)</b> |                        |                        |                         |                        |                       | <b>0.602</b>    |
| Mean (SD)                            | 0.108 (0.096)          | 0.181 (0.315)          | 0.179 (0.355)           | 0.172 (0.279)          | 0.137 (0.203)         |                 |
| Median [Min, Max]                    | 0.07 [0.02, 0.32]      | 0.08 [0.01, 2.07]      | 0.07 [0.01, 3.24]       | 0.09 [0.01, 1.77]      | 0.07 [0.01, 1.17]     |                 |
