# Supplementary material for: Higher Trimethylamine-N-Oxide Plasma Levels with Increasing Age Are Mediated by Diet and Trimethylamine-Forming Bacteria
Source: PubMed Central journal article supplement (PMC8547441; doi:10.1128/msystems.00945-21), 2021-09-14
Supplement: msystems.00945-21-st002.pdf [file msystems.00945-21-st002.pdf]

**Table S2.** Effect of sex on TMAO, TMA precursors and TMA-producing bacteria. Diet and age were determined as important explanatory variables as well and p-values adjusted for either of these parameters (p.adj.diet; p.adj.age) are given as well.

|                  | <b>Estimate</b> | <b>p.val</b> | <b>p.adj.diet</b> | <b>p.adj.age</b> |
|------------------|-----------------|--------------|-------------------|------------------|
| <i>cutC</i>      | -0.276          | <b>0.002</b> | <b>0.018</b>      | <b>0.002</b>     |
| <i>cntA</i>      | -0.456          | <b>0.015</b> | 0.127             | 0.014            |
| <i>grdH</i>      | 0.046           | 0.684        | 0.598             | 0.686            |
| <b>Choline</b>   | 0.202           | <b>0.000</b> | <b>0.002</b>      | <b>0.000</b>     |
| <b>Betaine</b>   | 0.349           | <b>0.000</b> | <b>0.000</b>      | <b>0.000</b>     |
| <b>Carnitine</b> | 0.200           | <b>0.000</b> | <b>0.000</b>      | <b>0.000</b>     |
| <b>TMAO</b>      | 0.036           | 0.600        | 0.457             | 0.561            |
