# Supplementary material for: Higher Trimethylamine-N-Oxide Plasma Levels with Increasing Age Are Mediated by Diet and Trimethylamine-Forming Bacteria
Source: PubMed Central journal article supplement (PMC8547441; doi:10.1128/msystems.00945-21), 2021-09-14
Supplement: msystems.00945-21-st004.pdf [file msystems.00945-21-st004.pdf]

**Table S4.** Effect of precursors and dietary items on TMA-producing bacteria. Age and sex were determined as important explanatory variables and p-values adjusted for either of these parameters (p.adj.age; p.adj.sex) are given as well.

|             | Predictor  | Estimate | p.val        | p.adj.age    | p.adj.sex    |
|-------------|------------|----------|--------------|--------------|--------------|
| <i>cutC</i> | Choline    | -0.106   | 0.218        | 0.127        | 0.482        |
| <i>cutC</i> | Betaine    | -0.028   | 0.718        | 0.368        | 0.665        |
| <i>cutC</i> | Carnitine  | -0.065   | 0.520        | 0.276        | 0.911        |
| <i>cutC</i> | Fruits     | 0.138    | <b>0.003</b> | <b>0.013</b> | <b>0.011</b> |
| <i>cutC</i> | Salad      | 0.036    | 0.248        | 0.152        | 0.523        |
| <i>cutC</i> | Vegetables | 0.080    | <b>0.038</b> | <b>0.047</b> | 0.077        |
| <i>cutC</i> | Rice       | -0.040   | 0.257        | 0.659        | 0.103        |
| <i>cutC</i> | Eggs       | -0.006   | 0.895        | 0.953        | 0.723        |
| <i>cutC</i> | Full grain | -0.007   | 0.805        | 0.710        | 0.387        |
| <i>cntA</i> | Choline    | -0.271   | 0.143        | 0.070        | 0.300        |
| <i>cntA</i> | Betaine    | 0.003    | 0.987        | 0.569        | 0.439        |
| <i>cntA</i> | Carnitine  | -0.265   | 0.224        | 0.097        | 0.522        |
| <i>cntA</i> | Fruits     | 0.164    | 0.084        | 0.261        | 0.176        |
| <i>cntA</i> | Salad      | 0.156    | <b>0.014</b> | <b>0.005</b> | <b>0.039</b> |
| <i>cntA</i> | Vegetables | 0.069    | 0.383        | 0.449        | 0.541        |
| <i>cntA</i> | Rice       | 0.013    | 0.861        | 0.321        | 0.842        |
| <i>cntA</i> | Eggs       | -0.078   | 0.370        | 0.484        | 0.603        |
| <i>cntA</i> | Full grain | 0.098    | 0.083        | 0.103        | 0.198        |
| <i>grdH</i> | Choline    | -0.076   | 0.474        | 0.499        | 0.408        |
| <i>grdH</i> | Betaine    | -0.117   | 0.226        | 0.265        | 0.159        |
| <i>grdH</i> | Carnitine  | -0.017   | 0.893        | 0.934        | 0.758        |
| <i>grdH</i> | Fruits     | 0.052    | 0.359        | 0.310        | 0.318        |
| <i>grdH</i> | Salad      | 0.027    | 0.478        | 0.500        | 0.427        |
| <i>grdH</i> | Vegetables | -0.015   | 0.744        | 0.757        | 0.777        |
| <i>grdH</i> | Rice       | 0.007    | 0.873        | 0.953        | 0.822        |
| <i>grdH</i> | Eggs       | 0.003    | 0.958        | 0.980        | 0.990        |
| <i>grdH</i> | Full grain | 0.059    | 0.083        | 0.080        | 0.065        |
| <b>TMAO</b> | Choline    | 0.293    | <b>0.000</b> | <b>0.000</b> | <b>0.000</b> |
| <b>TMAO</b> | Betaine    | 0.052    | 0.386        | 0.813        | 0.392        |
| <b>TMAO</b> | Carnitine  | 0.130    | 0.099        | 0.202        | 0.128        |
| <b>TMAO</b> | Fruits     | 0.026    | 0.452        | 0.937        | 0.396        |
| <b>TMAO</b> | Salad      | 0.014    | 0.565        | 0.391        | 0.493        |
| <b>TMAO</b> | Vegetables | 0.028    | 0.344        | 0.409        | 0.311        |
| <b>TMAO</b> | Rice       | -0.037   | 0.175        | 0.533        | 0.196        |
| <b>TMAO</b> | Eggs       | 0.107    | <b>0.001</b> | <b>0.000</b> | <b>0.001</b> |
| <b>TMAO</b> | Full grain | 0.023    | 0.274        | 0.320        | 0.225        |
