# Supplementary material for: Higher Trimethylamine-N-Oxide Plasma Levels with Increasing Age Are Mediated by Diet and Trimethylamine-Forming Bacteria
Source: PubMed Central journal article supplement (PMC8547441; doi:10.1128/msystems.00945-21), 2021-09-14
Supplement: msystems.00945-21-st005.pdf [file msystems.00945-21-st005.pdf]

**Table S5.** Effects of age on dietary habits, i.e., consumption of individual dietary items and contribution of overall dietary groups (Rarely Meat and Daily Meat).

|                                 | <b>Estimate</b> | <b>p.val</b> |
|---------------------------------|-----------------|--------------|
| <b>Fruits</b>                   | 0.026           | <b>0.000</b> |
| <b>Salad</b>                    | -0.005          | 0.349        |
| <b>Vegetables</b>               | 0.006           | 0.335        |
| <b>Rice</b>                     | -0.023          | <b>0.000</b> |
| <b>Eggs</b>                     | -0.008          | 0.180        |
| <b>Full grain</b>               | 0.011           | 0.050        |
| <b>Rarely Meat / Daily Meat</b> | -0.021          | <b>0.001</b> |
